# Supplementary material
Source: Springer Nature journal article supplement (https://www.springermedizin.de/resource/supplementary/13054_2011_9633_MOESM5_ESM.pdf/9706660)
Supplement: MOESM5 [file 9706660]

# How frequently do you try to optimize central venous pressure, arterial pressure, and cardiac output in this setting?

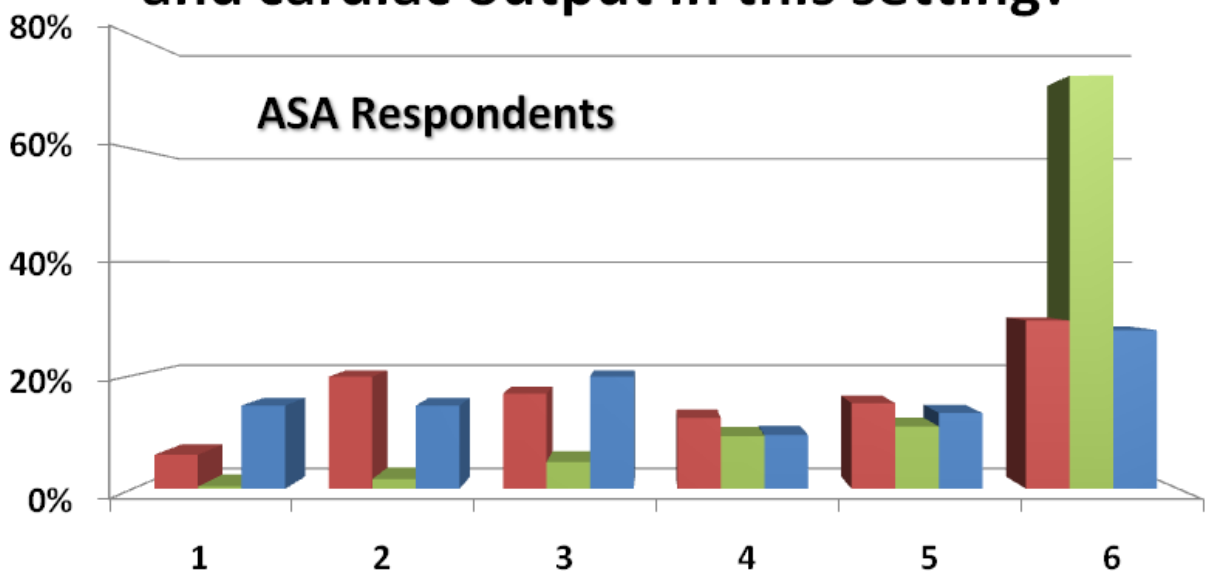

1. Never
2. Less than 5 % of the time
3. Between 5 and 25 % of the time
4. Between 25 and 50 % of the time
5. Between 50 and 75 % of the time
6. More than 75 % of the time

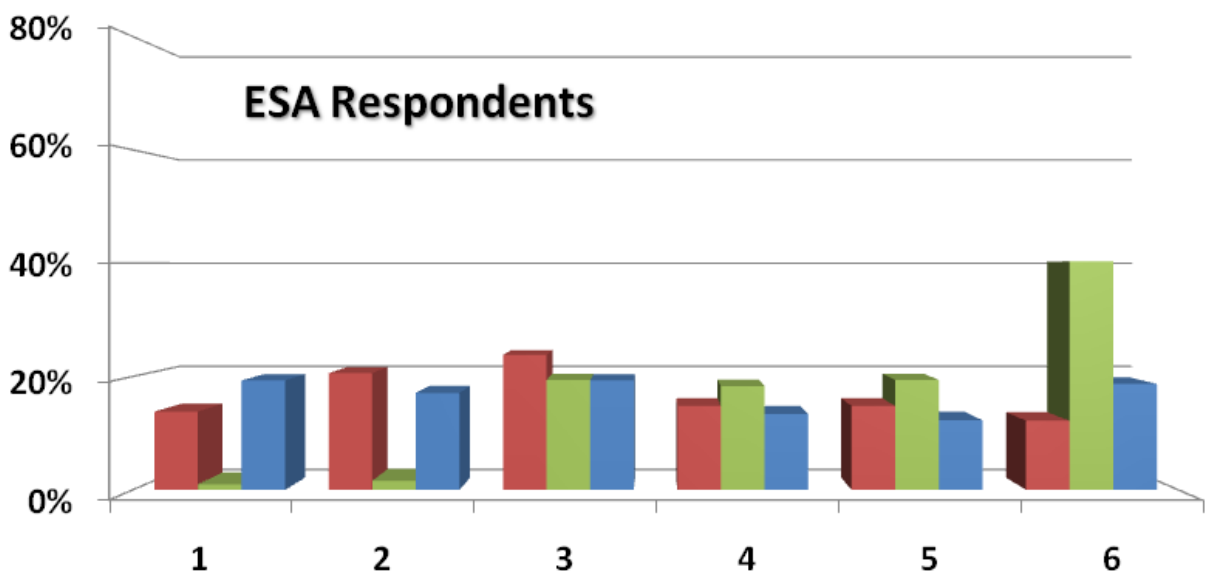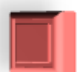

**Central Venous Pressure**

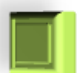

**Arterial Pressure**

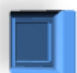

**Cardiac Output**
